# Supplementary material for: High risk clear cell renal cell carcinoma microenvironments contain protumour immunophenotypes lacking specific immune checkpoints
Source: Springer Nature journal article supplement (doi:10.1038/s41698-023-00441-5), 2023-09-11

## Supplementary Material

**Supplementary Table 1. A comparison of the proportion of immune infiltrate, immune cell types, CD8<sup>+</sup> T, TAM and monocyte sub-types within the ccRCC TMEs.** Statistical significance of the identified proportions of immune infiltrates within the TMEs (ANOVA), immune cell types, CD8<sup>+</sup> T cell sub-types and TAM/Monocyte sub-types (pair-wise tests).

|                                            | All grades<br>(p.value) | HG vs LG TME<br>(p.value) | HG vs pTME<br>(p.value) | LG vs pTME<br>(p.value) |
|--------------------------------------------|-------------------------|---------------------------|-------------------------|-------------------------|
| <b>Immune infiltration within the TMEs</b> |                         |                           |                         |                         |
| <b>Immune/non-immune</b>                   | 2.90 <sup>-10</sup>     | 0.007                     | 9.00 <sup>-7</sup>      | 0.058                   |
| <b>Immune cell types</b>                   |                         |                           |                         |                         |
| <b>CD4<sup>+</sup> T cells</b>             | 2.8 <sup>-4</sup>       | 1.70 <sup>-5</sup>        | 7.10 <sup>-06</sup>     | 0.032                   |
| <b>CD8<sup>+</sup> T cells</b>             | 7.1 <sup>-3</sup>       | 6.20 <sup>-5</sup>        | 0.016                   | 0.054                   |
| <b>Macrophages</b>                         | 1.5 <sup>-2</sup>       | 5.3 <sup>-3</sup>         | 0.16                    | 0.1                     |
| <b>Monocytes</b>                           | 0.26                    | 0.38                      | 0.33                    | 0.28                    |
| <b>CD8<sup>+</sup> T cells sub-types</b>   |                         |                           |                         |                         |
| <b>CD8<sup>+</sup> Tissue-resident</b>     | 3.1 <sup>-4</sup>       | 1.00 <sup>-4</sup>        | 0.38                    | 1.4 <sup>-3</sup>       |
| <b>CD8<sup>+</sup> NK-like</b>             | 0.13                    | 0.51                      | 0.087                   | 0.17                    |
| <b>CD8<sup>+</sup> Exhausted IEG</b>       | 0.021                   | 8.3 <sup>-3</sup>         | 0.7                     | 1.8 <sup>-3</sup>       |
| <b>CD8<sup>+</sup> Exhausted</b>           | 0.083                   | 0.29                      | 0.73                    | 0.14                    |
| <b>CD8<sup>+</sup> Proliferative</b>       | 8.9 <sup>-4</sup>       | 2.7 <sup>-4</sup>         | 0.031                   | 0.14                    |
| <b>TAM/Monocytes sub-types</b>             |                         |                           |                         |                         |
| <b>TAM ISG<sup>int</sup></b>               | 9.50 <sup>-13</sup>     | 2.8 <sup>-4</sup>         | 0.12                    | 8.4 <sup>-4</sup>       |
| <b>TAM HLA<sup>hi</sup></b>                | 0.3                     | 0.41                      | 0.13                    | 0.49                    |
| <b>TAM HLA<sup>int</sup></b>               | 1.90 <sup>-5</sup>      | 0.046                     | 3.1 <sup>-4</sup>       | 5.8 <sup>-3</sup>       |
| <b>TAM ISG<sup>hi</sup></b>                | 6.4 <sup>-4</sup>       | 0.15                      | 8.5 <sup>-3</sup>       | 5.9 <sup>-3</sup>       |
| <b>Tissue-resident monocytes</b>           | 7.30 <sup>-11</sup>     | 1.4 <sup>-3</sup>         | 5.40 <sup>-5</sup>      | 0.86                    |

**Supplementary Table 2. *TCF7* and *ENTPD1* genes within the high-grade CD8<sup>+</sup> T cell sub-types.** Within the high-grade TMEs, we investigated the stem-like progenitor (*TCF7*) and immunomodulatory (*ENTPD1*) genes within each CD8<sup>+</sup> T cell sub-type. For each CD8<sup>+</sup> T cell sub-type, we determined both the percentage of the ST-spots and their relative expression of *TCF7* and *ENTPD1* genes. The highest relative expression of *TCF7* was identified within sub-populations of CD8<sup>+</sup> exhausted IEG and CD8<sup>+</sup> exhausted T cells within HG\_1.2 and HG\_1.3. The highest relative expression of *ENTPD1* was identified within sub-populations of exhausted CD8<sup>+</sup> proliferative T cells in HG\_1.3 and HG\_3.2, and non-exhausted CD8<sup>+</sup> tissue-resident T cells in HG\_2.

|        |                                  | <i>TCF7</i> |                     | <i>ENTPD1</i> |                     |
|--------|----------------------------------|-------------|---------------------|---------------|---------------------|
|        | CD8 <sup>+</sup> T cell sub-type | % ST-spots  | Relative expression | % ST-spots    | Relative expression |
| HG_1.2 | Tissue-resident                  |             |                     |               |                     |
|        | NK-like                          | 0.13        | -0.39               | 0.33          | -0.44               |
|        | Exhausted IEG                    | 0.08        | 0.69                | 0.10          | -0.44               |
|        | Exhausted                        |             |                     | 0.18          | -0.44               |
|        | Proliferative                    | 0.18        | -0.39               | 0.15          | -0.44               |
| HG_1.3 | Tissue-resident                  |             |                     |               |                     |
|        | NK-like                          |             |                     | 0.14          | -0.44               |
|        | Exhausted IEG                    | 0.14        | -0.39               | 0.14          | -0.44               |
|        | Exhausted                        | 0.11        | 2.85                | 0.05          | -0.44               |
|        | Proliferative                    | 0.15        | -0.39               | 0.27          | 1.78                |
| HG_2   | Tissue-resident                  | 0.03        | -0.39               | 0.13          | 2.77                |
|        | NK-like                          | 0.05        | -0.39               | 0.05          | -0.44               |
|        | Exhausted IEG                    |             |                     |               |                     |
|        | Exhausted                        |             |                     |               |                     |
|        | Proliferative                    |             |                     | 0.20          | -0.44               |
| HG_3.2 | Tissue-resident                  |             |                     |               |                     |
|        | NK-like                          | 0.03        | -0.39               | 0.18          | -0.44               |
|        | Exhausted IEG                    |             |                     |               |                     |
|        | Exhausted                        | 0.04        | -0.39               | 0.13          | -0.44               |
|        | Proliferative                    | 0.03        | -0.39               | 0.13          | 0.24                |

**Supplementary Figure 1. Anti-inflammatory gene signature in TAM and monocyte subtypes within the high-grade ccRCC TME.** The anti-inflammatory gene signature demonstrated consistent expression levels across TAM and monocytes within the HG TMEs. However, triggering receptor expressed on myeloid cells 2 (*TREM2*, orange) demonstrated higher expression levels within pro-tumour TAM  $\text{HLA}^{\text{hi}}$  and TAM  $\text{ISG}^{\text{hi}}$  in HG\_3 TME. The anti-inflammatory gene signature includes interferon-responsive (*IFI27*), cysteine cathepsins (*CTSL*, *CTSS*), complement-related (*C1QA*, *C1QB*, *C1QC*, *SERPING1*), lipid transport-related (*APOE*, *PLTP*, *TREM2*) and HLA class I (*HLA-A*, *HLA-B*, *HLA-C*, *HLA-E*, *HLA-F* and *HLA-G*) and II (*HLA-DPA1*, *HLA-DQA1*, *HLA-DRA*, *HLA-DMB* and *HLA-DOA*) genes.

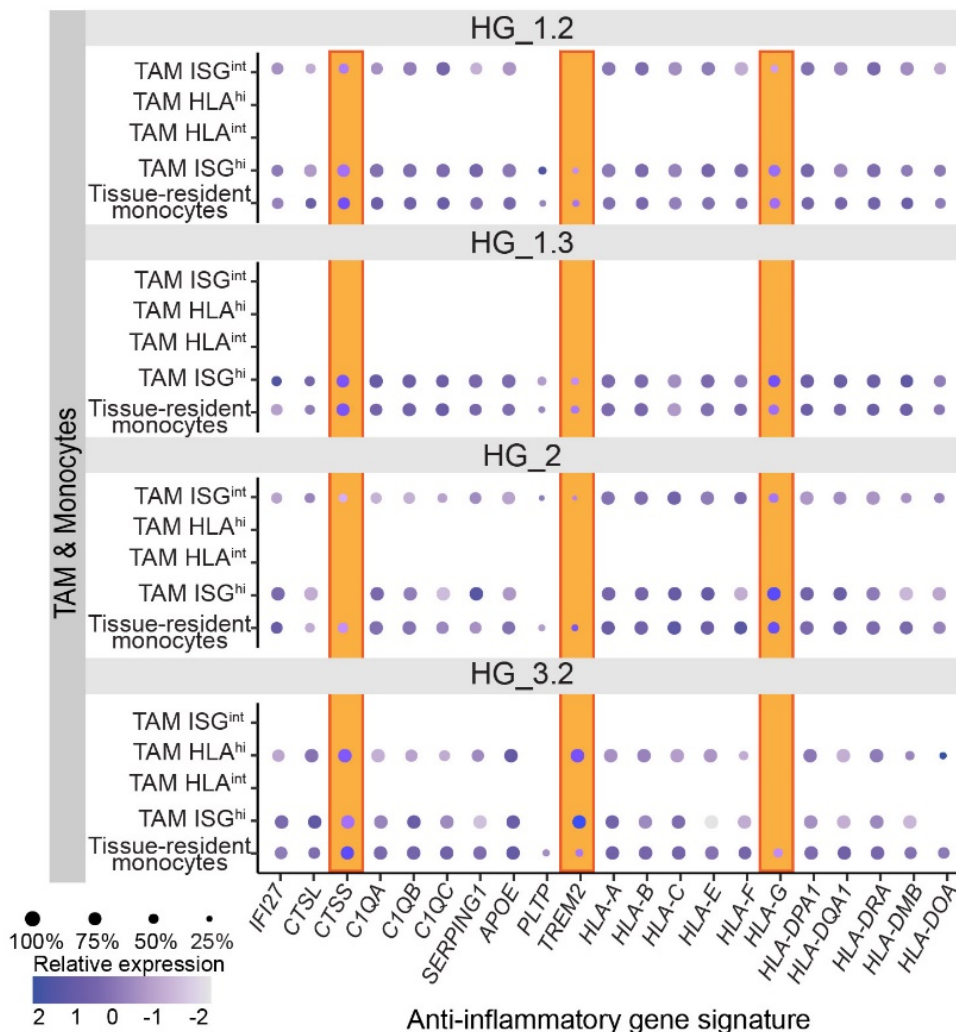

**Supplementary Figure 2. CD8<sup>+</sup> T cells, TAM and Monocytes mapped within the TME.**

Exhausted CD8<sup>+</sup> T cell and pro-tumour TAM and monocyte sub-types are mapped within respective tissue sections annotated based on histological features of tumour/immune, non-tumour, fibrotic/tumour/immune, fibrotic, scarred regions with immune infiltrate, immune nests and oedema. Exhausted CD8<sup>+</sup> T cell and pro-tumour TAM and monocyte sub-types were absent within the pHG\_1.1 and pHG\_3.1 but abundant within respective HG\_1.3 and HG\_3.2 tumour/immune regions. However, all LG and HG\_2 TMEs demonstrated abundant non-exhausted CD8<sup>+</sup> T cell and anti-tumour TAM sub-type within the tumour/immune regions.

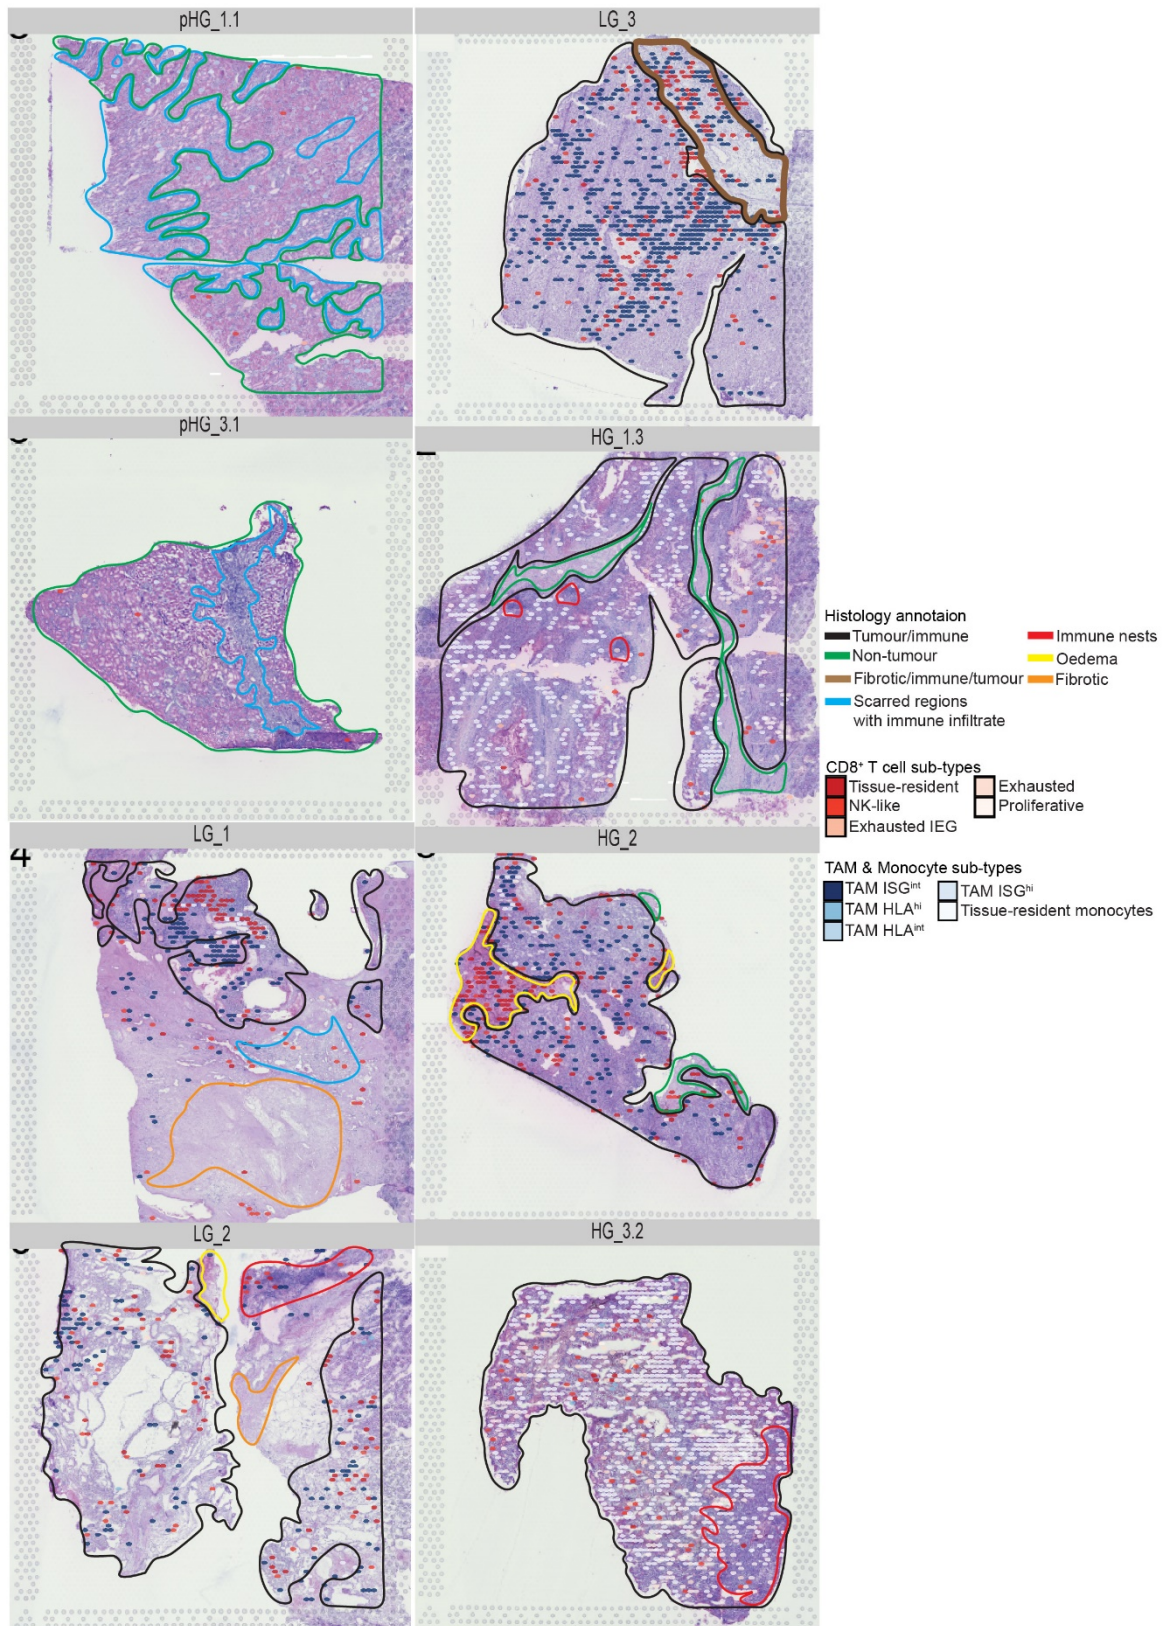

Supplement: MOESM1 [file 41698_2023_441_MOESM1_ESM.pdf]
